# Supplementary material
Source: PubMed Central journal article supplement (PMC4375079)
Supplement: supp_db14-0703_DB140703SupplementaryData1.pdf [file supp_db14-0703_DB140703SupplementaryData1.pdf]

SUPPLEMENTARY DATA

**Supplementary Table 1.** Anti-diabetes drug target genes that lie in previously validated T2D or glycemic GWAS loci.

| Drug target gene      | Anti-diabetes medication class | Associated disease / trait                                 | GWAS Meta-Analysis (Sample size*)                       | Risk Allele            | SNP association P-value <sup>†</sup> | SNP Effect <sup>†</sup> (95% CI or SE)                          | Latest Reference |
|-----------------------|--------------------------------|------------------------------------------------------------|---------------------------------------------------------|------------------------|--------------------------------------|-----------------------------------------------------------------|------------------|
| <i>ABCC8</i>          | Sulfonylureas, Meglitinides    | T2D                                                        | DIAGRAMv3 + MetaboChip (34,840 cases, 114,981 controls) | rs5215-C               | $8.5 \times 10^{-10}$                | Stage 2, OR=1.07 (1.04-1.10)                                    | (3)              |
| <i>KCNJ11</i>         | Sulfonylureas, Meglitinides    | T2D                                                        | DIAGRAMv3 + MetaboChip (34,840 cases, 114,981 controls) | rs5215-C               | $8.5 \times 10^{-10}$                | Stage 2, OR=1.07 (1.04-1.10)                                    | (3)              |
| <i>GIPR</i>           | DPP4 inhibitors                | T2D                                                        | DIAGRAMv3 + MetaboChip (34,840 cases, 114,981 controls) | rs8108269-G            | $2.1 \times 10^{-8}$                 | Stage 2, Female: OR=1.10 (1.06-1.15); Male: OR=1.05 (1.01-1.09) | (3)              |
|                       |                                | 2 hr glucose <sup>‡</sup>                                  | MAGIC (41,888 individuals)                              | rs10423928-A           | $2.0 \times 10^{-15}$                | Beta=0.09±0.01 (mmol/l)                                         | (8)              |
|                       |                                | 2 hr insulin <sup>‡</sup> (Adjusted for 2hr glucose & BMI) | MAGIC (32,204 individuals)                              | rs10423928-A           | $3.7 \times 10^{-16}$                | Beta=-0.044±0.006 (pmol/l)                                      | (8)              |
|                       |                                | Fasting glucose                                            | MAGIC + MetaboChip (116,141 individuals)                | rs2302593-C            | $9.3 \times 10^{-10}$                | Beta=0.0144±0.002 (mmol/l)                                      | (3)              |
| <i>IDE</i>            | Amylin mimetics                | T2D                                                        | DIAGRAMv3 + MetaboChip (34,840 cases, 114,981 controls) | rs1111875-C            | $2.0 \times 10^{-19}$                | Stage 2, OR=1.09 (1.06-1.12)                                    | (3)              |
| <i>IRS1</i>           | Insulin                        | T2D                                                        | DIAGRAMv3 + MetaboChip (34,840 cases, 114,981 controls) | rs2943640-C            | $2.7 \times 10^{-14}$                | Stage 2, OR=1.10 (1.07-1.13)                                    | (3)              |
|                       |                                | Fasting Insulin                                            | MAGIC + MetaboChip (99,566 individuals)                 | rs2972143-G            | $3.2 \times 10^{-8}$                 | Beta=0.0142±0.003 (pmol/l)                                      | (3)              |
|                       |                                | Fasting Insulin (BMI-adjusted)                             | MAGIC + MetaboChip (99,023 individuals)                 | rs2943645-T            | $2.3 \times 10^{-19}$                | Beta=0.0193±0.002 (pmol/l)                                      | (3)              |
| <i>PDX1</i>           | GLP-1 mimetics                 | Fasting glucose                                            | MAGIC + MetaboChip (132,996 individuals)                | rs11619319-G           | $1.3 \times 10^{-15}$                | Beta=0.0195 ±0.002 (mmol/l)                                     | (3)              |
| <i>PPARG</i>          | Thiazolidinediones             | T2D                                                        | DIAGRAMv3 + MetaboChip (34,840 cases, 114,981 controls) | rs1801282-C (Pro12Ala) | $1.1 \times 10^{-12}$                | Stage 2, OR=1.11 (1.07-1.16)                                    | (3)              |
| <i>SLC2A2 (GLUT2)</i> | Insulin                        | Fasting glucose                                            | MAGIC (119,024 individuals)                             | rs11920090-T           | $8.1 \times 10^{-13}$                | Stage 2, Beta=0.020 ±0.004 (mmol/l)                             | (3)              |

\* All samples sizes refer to Stages 1+2 (Discovery and Replication samples). The majority of studies contain individuals of European ancestry.

## SUPPLEMENTARY DATA

<sup>†</sup> All SNP association *P*-values and effect sizes are reported from joint GWAS meta-analyses (Stage 1+2), unless stated otherwise. <sup>‡</sup> 2 hr glucose and 2 hr insulin refer to glucose or insulin plasma levels measured 2 hours after a glucose challenge during an oral glucose tolerance test (OGTT). OR: odds-ratio. CI: confidence interval. SE: Standard Error.
