# Supplementary material
Source: PubMed Central journal article supplement (PMC4375079)
Supplement: supp_db14-0703_DB140703SupplementaryData3.pdf [file supp_db14-0703_DB140703SupplementaryData3.pdf]

## SUPPLEMENTARY DATA

### Online Appendix

#### DIAGRAM Consortium Author list

Andrew P Morris<sup>1,135</sup>, Ben F Voight<sup>2,3,135</sup>, Tanya M Teslovich<sup>4,135</sup>, Teresa Ferreira<sup>1,135</sup>, Ayellet V Segrè<sup>2,5,6,135</sup>, Valgerdur Steinthorsdottir<sup>7</sup>, Rona J Strawbridge<sup>8,9</sup>, Hassan Khan<sup>10</sup>, Harald Grallert<sup>11</sup>, Anubha Mahajan<sup>1</sup>, Inga Prokopenko<sup>1,12</sup>, Hyun Min Kang<sup>4</sup>, Christian Dina<sup>13,14,15</sup>, Tonu Esko<sup>16,17</sup>, Ross M Fraser<sup>18</sup>, Stavroula Kanoni<sup>19</sup>, Ashish Kumar<sup>1</sup>, Vasiliki Lagou<sup>1</sup>, Claudia Langenberg<sup>20</sup>, Jian'an Luan<sup>20</sup>, Cecilia M Lindgren<sup>1</sup>, Martina Müller-Nurasyid<sup>21,22,23</sup>, Sonali Pechlivanis<sup>24</sup>, N William Rayner<sup>1,12</sup>, Laura J Scott<sup>4</sup>, Steven Wiltshire<sup>1</sup>, Loic Yengo<sup>25,26</sup>, Leena Kinnunen<sup>27</sup>, Elizabeth J Rossin<sup>2,5,28,29</sup>, Soumya Raychaudhuri<sup>2,30,31</sup>, Andrew D Johnson<sup>32</sup>, Antigone S Dimas<sup>1,33,34</sup>, Ruth JF Loos<sup>20,35-37</sup>, Sailaja Vedantam<sup>38,39</sup>, Han Chen<sup>40</sup>, Jose C Florez<sup>5,6,38,41</sup>, Caroline Fox<sup>32,42</sup>, Ching-Ti Liu<sup>40</sup>, Denis Rybin<sup>43</sup>, David J Couper<sup>44</sup>, Wen Hong L Kao<sup>45</sup>, Man Li<sup>45</sup>, Marilyn C Cornelis<sup>46</sup>, Peter Kraft<sup>46,47</sup>, Qi Sun<sup>46,48</sup>, Rob M van Dam<sup>46,49</sup>, Heather M Stringham<sup>4</sup>, Peter S Chines<sup>50</sup>, Krista Fischer<sup>16</sup>, Pierre Fontanillas<sup>2</sup>, Oddgeir L Holmen<sup>51</sup>, Sarah E Hunt<sup>19</sup>, Anne U Jackson<sup>4</sup>, Augustine Kong<sup>7</sup>, Robert Lawrence<sup>52</sup>, Julia Meyer<sup>22</sup>, John RB Perry<sup>1,53</sup>, Carl GP Platou<sup>51,54</sup>, Simon Potter<sup>19</sup>, Emil Rehnberg<sup>55</sup>, Neil Robertson<sup>1,12</sup>, Suthesh Sivapalaratnam<sup>56</sup>, Alena Stancakova<sup>57</sup>, Kathleen Stirrups<sup>19</sup>, Gudmar Thorleifsson<sup>7</sup>, Emmi Tikkanen<sup>58,59</sup>, Andrew R Wood<sup>53</sup>, Peter Almgren<sup>60</sup>, Mustafa Atalay<sup>61</sup>, Rafn Benediktsson<sup>62,63</sup>, Lori L Bonnycastle<sup>50</sup>, Noël Burtt<sup>2</sup>, Jason Carey<sup>2</sup>, Guillaume Charpentier<sup>64</sup>, Andrew T Crenshaw<sup>2</sup>, Alex SF Doney<sup>65,66</sup>, Mozghan Dorkhan<sup>60</sup>, Sarah Edkins<sup>19</sup>, Valur Emilsson<sup>67</sup>, Elodie Eury<sup>25</sup>, Tom Forsen<sup>68,69</sup>, Karl Gertow<sup>8,9</sup>, Bruna Gigante<sup>70</sup>, George B Grant<sup>2</sup>, Christopher J Groves<sup>12</sup>, Candace Guiducci<sup>2</sup>, Christian Herder<sup>71</sup>, Astradur B Hreidarsson<sup>63</sup>, Jennie Hui<sup>72,73,74,75</sup>, Alan James<sup>72,76,77</sup>, Anna Jonsson<sup>60</sup>, Wolfgang Rathmann<sup>78</sup>, Norman Klopp<sup>11</sup>, Jasmina Kravic<sup>60</sup>, Kaarel Krjutškov<sup>16</sup>, Cordelia Langford<sup>19</sup>, Karin Leander<sup>70</sup>, Eero Lindholm<sup>60</sup>, Stéphane Lobbens<sup>25</sup>, Satu Männistö<sup>59</sup>, Ghazala Mirza<sup>1</sup>, Thomas W Mühleisen<sup>79,80</sup>, Bill Musk<sup>72,75,77,81</sup>, Melissa Parkin<sup>2</sup>, Loukianos Rallidis<sup>82</sup>, Jouko Saramies<sup>83</sup>, Bengt Sennblad<sup>8,9</sup>, Sonia Shah<sup>84</sup>, Gunnar Sigurðsson<sup>63,67</sup>, Angela Silveira<sup>8,9</sup>, Gerald Steinbach<sup>85</sup>, Barbara Thorand<sup>86</sup>, Joseph Trakalo<sup>1</sup>, Fabrizio Veglia<sup>87</sup>, Roman Wennauer<sup>85</sup>, Wendy Winckler<sup>2</sup>, Delilah Zabaneh<sup>88</sup>, Harry Campbell<sup>18,89</sup>, Cornelia van Duijn<sup>90,91</sup>, Andre G Uitterlinden<sup>90,91,92</sup>, Albert Hofman<sup>90</sup>, Eric Sijbrands<sup>92</sup>, Goncalo R Abecasis<sup>4</sup>, Katharine R Owen<sup>12,93</sup>, Eleftheria Zeggini<sup>19</sup>, Mieke D Trip<sup>56</sup>, Nita G Forouhi<sup>20</sup>, Ann-Christine Syvänen<sup>94</sup>, Johan G Eriksson<sup>59,68,95,96</sup>, Leena Peltonen<sup>2,19,58,59,139</sup>, Markus M Nöthen<sup>79,80</sup>, Beverley Balkau<sup>97,98</sup>, Colin NA Palmer<sup>65,66</sup>, Valeriya Lyssenko<sup>60</sup>, Tiinamaija Tuomi<sup>96,99</sup>, Bo Isomaa<sup>96,100</sup>, David J Hunter<sup>46,47,48</sup>, Lu Qi<sup>46,48</sup>, The Wellcome Trust Case Control Consortium<sup>140</sup>, Alan R Shuldiner<sup>101,102</sup>, Michael Roden<sup>71,103</sup>, Ines Barroso<sup>19,104,105</sup>, Tom Wilsgaard<sup>106</sup>, John Beilby<sup>72,73,74</sup>, Kees Hovingh<sup>56</sup>, Jackie F Price<sup>18</sup>, James F Wilson<sup>18,89</sup>, Rainer Rauramaa<sup>107,108</sup>, Timo A Lakka<sup>61,107</sup>, Lars Lind<sup>109</sup>, George Dedoussis<sup>110</sup>, Inger Njølstad<sup>106</sup>, Nancy L Pedersen<sup>55</sup>, Kay-Tee Khaw<sup>10</sup>, Nicholas J Wareham<sup>20</sup>, Sirkka M Keinänen-Kiukaanniemi<sup>111,112</sup>, Timo E Saaristo<sup>113,114</sup>, Eeva Korpi-Hyövälti<sup>115</sup>, Juha Saltevo<sup>116</sup>, Markku Laakso<sup>57</sup>, Johanna Kuusisto<sup>57</sup>, Andres Metspalu<sup>16,17</sup>, Francis S Collins<sup>50</sup>, Karen L Mohlke<sup>117</sup>, Richard N Bergman<sup>118</sup>, Jaakko Tuomilehto<sup>27,115,119,120</sup>, Bernhard O Boehm<sup>121</sup>, Christian Gieger<sup>22</sup>, Kristian Hveem<sup>51</sup>, Stephane Cauchi<sup>25</sup>, Philippe Froguel<sup>25,122</sup>, Damiano Baldassarre<sup>87,123</sup>, Elena Tremoli<sup>87,123</sup>, Steve E Humphries<sup>84</sup>, Danish Saleheen<sup>10,124</sup>, John Danesh<sup>10</sup>, Erik Ingelsson<sup>55</sup>, Samuli Ripatti<sup>19,58,59</sup>, Veikko Salomaa<sup>59</sup>, Raimund Erbel<sup>125</sup>, Karl-Heinz Jöckel<sup>24</sup>, Susanne Moebus<sup>24</sup>, Annette Peters<sup>86</sup>, Thomas Illig<sup>11,126</sup>, Ulf de Faire<sup>70</sup>, Anders Hamsten<sup>8,9</sup>, Andrew D Morris<sup>65,66</sup>, Peter J Donnelly<sup>1,127</sup>, Timothy M Frayling<sup>53</sup>, Andrew T Hattersley<sup>128</sup>, Eric Boerwinkle<sup>129,130</sup>, Olle Melander<sup>60</sup>, Sekar Kathiresan<sup>2,5,131</sup>, Peter M Nilsson<sup>60</sup>, Panos Deloukas<sup>19</sup>, Unnur Thorsteinsdottir<sup>7,62</sup>, Leif C Groop<sup>60</sup>, Kari Stefansson<sup>7,62</sup>, Frank Hu<sup>46,48</sup>, James S Pankow<sup>132</sup>, Josée Dupuis<sup>32,40</sup>, James B Meigs<sup>6,133</sup>, David Altshuler<sup>2,5,6,134,135,136</sup>, Michael Boehnke<sup>4</sup>, Mark I McCarthy<sup>1,12,93</sup>.

#### DIAGRAM Consortium Affiliations

- 1 Wellcome Trust Centre for Human Genetics, University of Oxford, Oxford, OX3 7BN, UK
- 2 Broad Institute of Harvard and Massachusetts Institute of Technology (MIT), Cambridge, MA 02142, USA
- 3 University of Pennsylvania - Perelman School of Medicine, Department of Pharmacology, Philadelphia PA 19104, USA
- 4 Department of Biostatistics, University of Michigan, Ann Arbor, Michigan 48109-2029, USA
- 5 Center for Human Genetic Research, Massachusetts General Hospital, 185 Cambridge Street, Boston, MA 02114, USA
- 6 Department of Medicine, Harvard Medical School, Boston, MA 02115, USA
- 7 deCODE Genetics, 101 Reykjavik, Iceland
- 8 Atherosclerosis Research Unit, Department of Medicine Solna, Karolinska Institutet, Stockholm, Sweden
- 9 Center for Molecular Medicine, Karolinska University Hospital Solna, Stockholm, Sweden
- 10 Department of Public Health and Primary Care, University of Cambridge, Cambridge, CB1 8RN, UK
- 11 Research Unit of Molecular Epidemiology, Helmholtz Zentrum Muenchen, 85764 Neuherberg, Germany
- 12 Oxford Centre for Diabetes, Endocrinology and Metabolism, University of Oxford, OX3 7LJ, UK
- 13 Inserm UMR 1087, 44007 Nantes, France
- 14 CNRS UMR 6291, 44007 Nantes, France
- 15 Nantes University, 44007 Nantes, France
- 16 Estonian Genome Center, University of Tartu, Tartu, Estonia
- 17 Institute of Molecular and Cell Biology, University of Tartu, Tartu, Estonia
- 18 Centre for Population Health Sciences, University of Edinburgh, Teviot Place, Edinburgh, EH8 9AG, UK
- 19 Wellcome Trust Sanger Institute, Hinxton, Cambridge CB10 1SA, UK
- 20 MRC Epidemiology Unit, Institute of Metabolic Science, Addenbrooke's Hospital, Cambridge CB2 0QQ, UK
- 21 Institute of Medical Informatics, Biometry and Epidemiology, Ludwig-Maximilians-Universität, 81377 Munich, Germany
- 22 Institute of Genetic Epidemiology, Helmholtz Zentrum Muenchen, 85764 Neuherberg, Germany
- 23 Department of Medicine I, University Hospital Grosshadern, Ludwig-Maximilians-University, Munich, Germany
- 24 Institute for Medical Informatics, Biometry and Epidemiology, University Hospital of Essen, University Duisburg-Essen, 45122 Essen, Germany
- 25 CNRS-UMR-8199, Institute of Biology and Lille 2 University, Pasteur Institute, F-59019 Lille, France
- 26 University Lille 1, Laboratory of Mathematics, CNRS-UMR 8524, MODAL team, INRIA Lille Nord-Europe
- 27 Diabetes Prevention Unit, National Institute for Health and Welfare, 00271 Helsinki, Finland
- 28 Health Science and Technology MD Program, Harvard University and Massachusetts Institute of Technology, Boston, Massachusetts, USA
- 29 Harvard Biological and Biomedical Sciences Program, Harvard University, Boston, Massachusetts, USA

## SUPPLEMENTARY DATA

30 Division of Rheumatology, Immunology and Allergy, Brigham and Women's Hospital, Harvard Medical School, Boston, MA 02115, USA  
31 Partners Center for Personalized Genomic Medicine, Boston, MA 02115, USA  
32 National Heart, Lung, and Blood Institute's Framingham Heart Study, Framingham, MA 01702, USA  
33 Department of Genetic Medicine and Development, University of Geneva Medical School, Geneva 1211, Switzerland  
34 Biomedical Sciences Research Center Al. Fleming, 16672 Vari, Greece  
35 Charles R. Bronfman Institute for Personalized Medicine, Mount Sinai School of Medicine, New York, NY, USA  
36 Child health and Development Institute, Mount Sinai School of Medicine, New York, NY 10029.  
37 Department of Preventive Medicine, Mount Sinai School of Medicine, New York, NY 10029.  
38 Program in Medical and Population Genetics, Broad Institute, Cambridge, Massachusetts, USA  
39 Division of Genetics and Endocrinology, Children's Hospital, Boston, MA 02115, USA  
40 Department of Biostatistics, Boston University School of Public Health, Boston, MA 02118, USA  
41 Diabetes Research Center, Diabetes Unit, Massachusetts General Hospital, Boston, Massachusetts, USA  
42 Division of Endocrinology and Metabolism, Brigham and Women's Hospital and Harvard Medical School, Boston, Massachusetts, USA  
43 Boston University Data Coordinating Center, Boston, Massachusetts, USA  
44 Collaborative Studies Coordinating Center, Department of Biostatistics, University of North Carolina at Chapel Hill, Chapel Hill, NC 27599, USA  
45 Department of Epidemiology, Johns Hopkins Bloomberg School of Public Health, Baltimore, MD 21287, USA  
46 Department of Nutrition and Epidemiology, Harvard School of Public Health, 665 Huntington Ave, Boston, MA 02115, USA  
47 Program in Molecular and Genetic Epidemiology, Harvard School of Public Health, 665 Huntington Ave, Boston, MA 02115, USA  
48 Channing Laboratory, Dept. of Medicine, Brigham and Women's Hospital and Harvard Medical School, 181 Longwood Ave, Boston, MA 02115, USA  
49 Saw Swee Hock School of Public Health, National University of Singapore, 21 Lower Kent Ridge Road, Singapore 119077  
50 National Human Genome Research Institute, National Institutes of Health, Bethesda, MD 20892, USA  
51 HUNT Research Centre, Department of Public Health and General Practice, Norwegian University of Science and Technology, Levanger, Norway  
52 Centre for Genetic Epidemiology and Biostatistics, The University of Western Australia, Nedlands, WA 6009, Australia  
53 Genetics of Complex Traits, Institute of Biomedical and Clinical Science, Peninsula Medical School, University of Exeter, Magdalen Road, Exeter EX1 2LU, UK  
54 Department of Internal Medicine, Levanger Hospital, Nord-Trøndelag Health Trust, B-7600 Levanger, Norway  
55 Dept of Medical Epidemiology and Biostatistics, Karolinska Institutet, Box 281, SE-171 77 Stockholm, Sweden  
56 Department of Vascular Medicine, Academic Medical Center, University of Amsterdam, PO-BOX 22660, 1100DD, Amsterdam, the Netherlands  
57 Department of Medicine, University of Eastern Finland and Kuopio University Hospital, 70210 Kuopio, Finland  
58 Institute for Molecular Medicine Finland (FIMM), Helsinki FIN-00014, Finland  
59 Department of Chronic Disease Prevention, National Institute for Health and Welfare, Helsinki FIN-00271, Finland  
60 Lund University Diabetes Centre, Department of Clinical Science Malmö, University Hospital Scania, Lund University, 20502 Malmö, Sweden  
61 Institute of Biomedicine, Physiology, University of Eastern Finland, Kuopio Campus, Kuopio, Finland  
62 Faculty of Medicine, University of Iceland, 101 Reykjavík, Iceland  
63 Landspítali University Hospital, 101 Reykjavík, Iceland  
64 Endocrinology-Diabetology Unit, Corbeil-Essonnes Hospital, F-91100 Corbeil-Essonnes, France  
65 Diabetes Research Centre, Biomedical Research Institute, University of Dundee, Ninewells Hospital, Dundee DD1 9SY, UK  
66 Pharmacogenomics Centre, Biomedical Research Institute, University of Dundee, Ninewells Hospital, Dundee DD1 9SY, UK  
67 Icelandic Heart Association, 201 Kopavogur, Iceland  
68 Department of General Practice and Primary Health Care, University of Helsinki, 00014 Helsinki, Finland  
69 Vaasa Health Care Centre, 65100 Vaasa, Finland  
70 Division of Cardiovascular Epidemiology, Institute of Environmental Medicine, Karolinska Institutet, Stockholm, Sweden  
71 Institute for Clinical Diabetology, German Diabetes Center, Leibniz Center for Diabetes Research at Heinrich Heine University Düsseldorf, 40225 Düsseldorf, Germany  
72 Busselton Population Medical Research Institute, Sir Charles Gairdner Hospital, Nedlands, WA 6009, Australia  
73 PathWest Laboratory Medicine of Western Australia, QEII Medical Centre, Nedlands, WA 6009, Australia  
74 School of Pathology and Laboratory Medicine, The University of Western Australia, Nedlands, WA 6009, Australia  
75 School of Population Health, The University of Western Australia, Nedlands, WA 6009, Australia  
76 Dept of Pulmonary Physiology and Sleep Medicine, West Australian Sleep Disorders Research Institute, Queen Elizabeth II Medical Centre, Hospital Avenue, Nedlands WA 6009, Australia  
77 School of Medicine and Pharmacology, University of Western Australia, Nedlands WA 6009, Australia  
78 Institute of Biometrics and Epidemiology, German Diabetes Center, Leibniz Center for Diabetes Research at Heinrich Heine University Düsseldorf, 40225 Düsseldorf, Germany  
79 Institute of Human Genetics, University of Bonn, 53127 Bonn, Germany  
80 Department of Genomics, Life & Brain Center, University of Bonn, 53127 Bonn, Germany  
81 Respiratory Medicine, Sir Charles Gairdner Hospital, Nedlands, WA 6009, Australia  
82 University General Hospital Attikon, 1 Rimini, 12462 Chaidari, Athens, Greece  
83 South Karelia Central Hospital, Lappeenranta, Finland  
84 Institute of Cardiovascular Science, University College London, 5 University Street, London WC1E 6JJ, UK  
85 Department of Clinical Chemistry and Central Laboratory, University of Ulm, Ulm, Germany  
86 Institute of Epidemiology II, Helmholtz Zentrum Muenchen, 85764 Neuherberg, Germany  
87 Centro Cardiologico Monzino, IRCCS, via Carlo Parea 4, 20138, Milan, Italy  
88 UCL Genetics Institute, Department of Genetics, Evolution and Environment, University College London, Gower Street, London WC1E 6BT, UK  
89 MRC Institute of Genetics and Molecular Medicine at the University of Edinburgh, Western General Hospital, Edinburgh, EH4 2XU, UK  
90 Department of Epidemiology, Erasmus University Medical Center, P.O. Box 2040, 3000 CA Rotterdam, The Netherlands.  
91 Netherland Genomics Initiative, Netherlands Consortium for Healthy Ageing and Centre for Medical Systems Biology, P.O. Box 2040, 3000 CA Rotterdam, The Netherlands  
92 Department of Internal Medicine, Erasmus University Medical Center, P.O. Box 2040, 3000 CA Rotterdam, The Netherlands.  
93 Oxford National Institute for Health Research Biomedical Research Centre, Churchill Hospital, Old Road Headington, Oxford, OX3 7LJ, UK  
94 Molecular Medicine, Department of Medical Sciences, Uppsala University, SE-751 85 Uppsala, Sweden  
95 Unit of General Practice, Helsinki University General Hospital, Helsinki, Finland  
96 Folkhälsan Research Center, FIN-00014 Helsinki, Finland

## SUPPLEMENTARY DATA

97 INSERM CESP U1018, F-94807 Villejuif, France  
98 University Paris Sud 11, UMRS 1018, F-94807, Villejuif, France  
99 Department of Medicine, Helsinki University Hospital, University of Helsinki, 000290 HUS Helsinki, Finland  
100 Dept of Social Services and Health Care, 68601 Jakobstad, Finland  
101 Division of Endocrinology, Diabetes and Nutrition, University of Maryland School of Medicine, Baltimore, MD 21201, USA  
102 Geriatric Research Education and Clinical Center, Baltimore Veterans Administration Medical Center, Baltimore, MD 21201, USA  
103 Department of Medicine/Metabolic Diseases, Heinrich Heine University Düsseldorf, 40225 Düsseldorf, Germany  
104 University of Cambridge Metabolic Research Laboratories, Institute of Metabolic Science, Box 289, Addenbrooke's Hospital, Cambridge, CB2  
OQQ, UK  
105 NIHR Cambridge Biomedical Research Centre, Institute of Metabolic Science, Box 289, Addenbrooke's Hospital, Cambridge, CB2 OQQ, UK  
106 Dept of Community Medicine, Faculty of Health Sciences, University of Tromsø, N-9037 Tromsø, Norway  
107 Kuopio Research Institute of Exercise Medicine, Kuopio, Finland  
108 Department of Clinical Physiology and Nuclear Medicine, Kuopio University Hospital, Kuopio, Finland  
109 Department of Medical Sciences, Uppsala University, Akademiska Sjukhuset, SE-751 85 Uppsala, Sweden  
110 Department of Dietetics-Nutrition, Harokopio University, 70 El. Venizelou Str, Athens, Greece  
111 Faculty of Medicine, Institute of Health Sciences, University of Oulu, Oulu, Finland  
112 Unit of General Practice, Oulu University Hospital, Oulu, Finland  
113 Finnish Diabetes Association, Kirjoniementie 15, 33680, Tampere, Finland  
114 Pirkanmaa Hospital District, Tampere, Finland  
115 South Ostrobothnia Central Hospital, 60220 Seinäjoki, Finland  
116 Department of Medicine, Central Finland Central Hospital, 40620 Jyväskylä, Finland  
117 Department of Genetics, University of North Carolina, Chapel Hill, NC 27599, USA  
118 Diabetes and Obesity Research Institute, Cedars-Sinai Medical Center, Los Angeles, California, USA  
119 Red RECAVA Grupo RD06/0014/0015, Hospital Universitario La Paz, 28046 Madrid, Spain  
120 Centre for Vascular Prevention, Danube-University Krems, 3500 Krems, Austria  
121 Division of Endocrinology and Diabetes, Department of Internal Medicine, University Medical Centre Ulm, Ulm, Germany.  
122 Genomic Medicine, Imperial College London, Hammersmith Hospital, W12 0NN, London, UK  
123 Department of Pharmacological Sciences, University of Milan, via Balzaretti 9, 20133 Milan, Italy.  
124 Center for Non-Communicable Diseases Pakistan, Karachi, Pakistan  
125 Clinic of Cardiology, West German Heart Centre, University Hospital of Essen, University Duisburg-Essen, 45122 Essen, Germany  
126 Hannover Unified Biobank, Hannover Medical School, 30625 Hannover, Germany.  
127 Dept of Statistics, University of Oxford, 1 South Parks Road Oxford, OX1 3TG, UK  
128 Diabetes Genetics, Institute of Biomedical and Clinical Science, Peninsula Medical School, University of Exeter, Barrack Road, Exeter EX2 5DW,  
UK  
129 Human Genetics Center, University of Texas Health Science Center at Houston, Houston, TX 77030, USA  
130 Human Genome Sequencing Center at Baylor College of Medicine, Houston, TX 77030, USA  
131 Cardiovascular Research Center, Massachusetts General Hospital, 185 Cambridge Street, Boston, MA 02114, USA  
132 Division of Epidemiology and Community Health, University of Minnesota, Minneapolis, MN 55454, USA  
133 General Medicine Division, Massachusetts General Hospital, Boston, Massachusetts, USA  
134 Department of Genetics, Harvard Medical School, Boston, MA 02115, USA  
135 Department of Molecular Biology, Harvard Medical School, Boston, MA 02115, USA  
136 Diabetes Unit, Massachusetts General Hospital, Boston, MA 02144, USA  
139 Deceased

## SUPPLEMENTARY DATA

### MAGIC Investigators Author List

Josée Dupuis<sup>1,2,177</sup>, Claudia Langenberg<sup>3,177</sup>, Inga Prokopenko<sup>4,5,177</sup>, Richa Saxena<sup>6,7,177</sup>, Nicole Soranzo<sup>8,9,177</sup>, Anne U Jackson<sup>10</sup>, Eleanor Wheeler<sup>11</sup>, Nicole LGlazer<sup>12</sup>, Nabila Bouatia-Naji<sup>13</sup>, Anna LGloyn<sup>4</sup>, Cecilia MLindgren<sup>4,5</sup>, Reedik Mägi<sup>4,5</sup>, Andrew P Morris<sup>5</sup>, Joshua Randall<sup>5</sup>, Toby Johnson<sup>14-16</sup>, Paul Elliott<sup>17,176</sup>, Denis Rybin<sup>18</sup>, Gudmar Thorleifsson<sup>19</sup>, Valgerdur Steinthorsdottir<sup>19</sup>, Peter Henneman<sup>20</sup>, Harald Grallert<sup>21</sup>, Abbas Dehghan<sup>22</sup>, Jouke Jan Hottenga<sup>23</sup>, Christopher SFranklin<sup>24</sup>, Pau Navarro<sup>25</sup>, Kijoung Song<sup>26</sup>, Anuj Goel<sup>5,27</sup>, John R B Perry<sup>28</sup>, Josephine MEgan<sup>29</sup>, Taina Lajunen<sup>30</sup>, Niels Grarup<sup>31</sup>, Thomas Sparsø<sup>31</sup>, Alex Doney<sup>32</sup>, Benjamin F Voight<sup>6,7</sup>, Heather MStringham<sup>10</sup>, Man Li<sup>33</sup>, Stavroula Kanoni<sup>34</sup>, Peter Shrader<sup>35</sup>, Christine Cavalcanti-Proença<sup>13</sup>, Meena Kumari<sup>36</sup>, Lu Qi<sup>37</sup>, Nicholas J Timpson<sup>38</sup>, Christian Gieger<sup>21</sup>, Carina Zabena<sup>39</sup>, Ghislain Rocheleau<sup>40,41</sup>, Erik Ingelsson<sup>42,43</sup>, Ping An<sup>44</sup>, Jeffrey O'Connell<sup>45</sup>, Jian'an Luan<sup>3</sup>, Amanda Elliott<sup>6,7</sup>, Steven A McCarroll<sup>6,7</sup>, Felicity Payne<sup>11</sup>, Rosa Maria Roccascella<sup>11</sup>, François Pattou<sup>46</sup>, Praveen Sethupathy<sup>47</sup>, Kristin Ardlie<sup>48</sup>, Yavuz Ariyurek<sup>49</sup>, Beverley Balkau<sup>50</sup>, Philip Barter<sup>51</sup>, John P Beilby<sup>52,53</sup>, Yoav Ben-Shlomo<sup>54</sup>, Rafn Benediktsson<sup>55,56</sup>, Amanda J Bennett<sup>4</sup>, Sven Bergmann<sup>14,16</sup>, Murielle Bochud<sup>15</sup>, Eric Boerwinkle<sup>57</sup>, Amélie Bonnefond<sup>13</sup>, Lori LBonnycastle<sup>47</sup>, Knut Borch-Johnsen<sup>58,59</sup>, Yvonne Böttcher<sup>60</sup>, Eric Brunner<sup>36</sup>, Suzannah J Bumpstead<sup>8</sup>, Guillaume Charpentier<sup>61</sup>, Yii-Der Ida Chen<sup>62</sup>, Peter Chines<sup>47</sup>, Robert Clarke<sup>63</sup>, Lachlan J MCoim<sup>17</sup>, Matthew NCooper<sup>64</sup>, Marilyn Cornelis<sup>37</sup>, Gabe Crawford<sup>6</sup>, Laura Crisponi<sup>65</sup>, Ian NMDay<sup>38</sup>, Eco J Cde Geus<sup>23</sup>, Jerome Delplanque<sup>13</sup>, Christian Dina<sup>13</sup>, Michael R Erdos<sup>47</sup>, Annette CFedson<sup>64,66</sup>, Antje Fischer-Rosinsky<sup>67,68</sup>, Nita GForouhi<sup>3</sup>, Caroline SFOX<sup>2,69</sup>, Rune Frants<sup>70</sup>, Maria Grazia Franzosi<sup>71</sup>, Pilar Galan<sup>72</sup>, Mark OGoodarzi<sup>62</sup>, Jürgen Graessler<sup>73</sup>, Christopher J Groves<sup>4</sup>, Scott Grundy<sup>74</sup>, Rhian Gwilliam<sup>8</sup>, Ulf Gyllenstein<sup>75</sup>, Samy Hadjadj<sup>76</sup>, Göran Hallmans<sup>77</sup>, Naomí Hammond<sup>8</sup>, Xijing Han<sup>10</sup>, Anna-Liisa Hartikainen<sup>78</sup>, Neelam Hassanali<sup>4</sup>, Caroline Hayward<sup>25</sup>, Simon CHEath<sup>79</sup>, Serge Herberg<sup>80</sup>, Christian Herder<sup>81</sup>, Andrew A Hicks<sup>82</sup>, David R Hillman<sup>66,83</sup>, Aroon DHingorani<sup>36</sup>, Albert Hofman<sup>22</sup>, Jennie Hui<sup>52,84</sup>, Joe Hung<sup>85,86</sup>, Bo Isomaa<sup>87,88</sup>, Paul R V Johnson<sup>4,89</sup>, Torben Jørgensen<sup>90,91</sup>, Antti Jula<sup>92</sup>, Marika Kaakinen<sup>93</sup>, Jaakko Kaprio<sup>94-96</sup>, Y Antero Kesaniemi<sup>97</sup>, Mika Kivimäki<sup>36</sup>, Beatrice Knight<sup>98</sup>, Seppo Koskinen<sup>99</sup>, Peter Kovacs<sup>100</sup>, Kirsten Ohm Kyvik<sup>101</sup>, GMark Lathrop<sup>79</sup>, Debbie A Lawlor<sup>38</sup>, Olivier Le Bacquer<sup>13</sup>, Cécile Lecoeur<sup>13</sup>, Yun Li<sup>10</sup>, Valeriya Lyssenko<sup>102</sup>, Robert Mahley<sup>103</sup>, Massimo Mangino<sup>9</sup>, Alisa KManning<sup>1</sup>, Maria Teresa Martínez-Larrad<sup>39</sup>, Jarred B McAteer<sup>6,104,105</sup>, Laura J McCulloch<sup>4</sup>, Ruth McPherson<sup>106</sup>, Christa Meisinger<sup>21</sup>, David Melzer<sup>28</sup>, David Meyre<sup>13</sup>, Braxton DMitchell<sup>45</sup>, Mario A Morken<sup>47</sup>, Sutapa Mukherjee<sup>66,83</sup>, Silvia Naitza<sup>65</sup>, Narisu Narisu<sup>47</sup>, Matthew J Neville<sup>4,107</sup>, Ben A Oostra<sup>108</sup>, Marco Orrù<sup>65</sup>, Ruth Pakyz<sup>45</sup>, Colin NA Palmer<sup>109</sup>, Giuseppe Paolisso<sup>110</sup>, Cristian Pattaro<sup>82</sup>, Daniel Pearson<sup>47</sup>, John F Peden<sup>5,27</sup>, Nancy LPedersen<sup>42</sup>, Markus Perola<sup>96,111,112</sup>, Andreas F H Pfeiffer<sup>67,68</sup>, Irene Pichler<sup>82</sup>, Ozren Polasek<sup>113</sup>, Danielle Posthuma<sup>23,114</sup>, Simon CPotter<sup>8</sup>, Anneli Pouta<sup>115</sup>, Michael A Province<sup>44</sup>, Bruce MPSaty<sup>116,117</sup>, Wolfgang Rathmann<sup>118</sup>, Nigel WRayner<sup>4,5</sup>, Kenneth Rice<sup>119</sup>, Samuli Ripatti<sup>96,111</sup>, Fernando Rivadeneira<sup>22,120</sup>, Michael Roden<sup>81,121</sup>, Olov Rolandsson<sup>122</sup>, Anneli Sandback<sup>123</sup>, Manjinder Sandhu<sup>3,124</sup>, Serena Sanna<sup>65</sup>, Avan Aihie Sayer<sup>125</sup>, Paul Scheet<sup>126</sup>, Laura J Scott<sup>10</sup>, Udo Seedorf<sup>127</sup>, Stephen J Sharp<sup>3</sup>, Beverly Shields<sup>98</sup>, Gunnar Sigurdsson<sup>55,56</sup>, Eric J GSijbrands<sup>22,120</sup>, Angela Silveira<sup>128</sup>, Laila Simpson<sup>64,66</sup>, Andrew Singleton<sup>129</sup>, Nicholas LSmith<sup>130,131</sup>, Ulla Sovio<sup>17</sup>, Amy Swift<sup>47</sup>, Holly Syddall<sup>125</sup>, Ann-Christine Syvänen<sup>132</sup>, Toshiko Tanaka<sup>133,134</sup>, Barbara Thorand<sup>21</sup>, Jean Tichet<sup>135</sup>, Anke Tönjes<sup>60,136</sup>, Tiinamaija Tuomi<sup>87,137</sup>, André Gutterlinden<sup>22,120</sup>, Ko Willems van Dijk<sup>70,138</sup>, Mandy van Hoek<sup>120</sup>, Dhiraj Varma<sup>8</sup>, Sophie Visvikis-Siest<sup>139</sup>, Veronique Vitart<sup>25</sup>, Nicole Vogelzang<sup>140</sup>, Gérard Waeber<sup>141</sup>, Peter J Wagner<sup>96,111</sup>, Andrew Walley<sup>142</sup>, GBragi Walters<sup>19</sup>, Kim LWARD<sup>64,66</sup>, Hugh Watkins<sup>5,27</sup>, Michael NWeedon<sup>28</sup>, Sarah H Wild<sup>24</sup>, Gonneke Willemsen<sup>23</sup>, Jaqueline CMWitteman<sup>22</sup>, John WGYarnell<sup>143</sup>, Eleftheria Zeggini<sup>5,8</sup>, Diana Zelenika<sup>79</sup>, Björn Zethelius<sup>43,144</sup>, Guangju Zhai<sup>9</sup>, Jing Hua Zhao<sup>3</sup>, MCarola Zillikens<sup>120</sup>, DIAGRAMConsortium<sup>145</sup>, GIANTConsortium<sup>145</sup>, Global BPgen Consortium<sup>145</sup>, Ingrid B Borecki<sup>44</sup>, Ruth J F Loos<sup>3</sup>, Pierre Meneton<sup>80</sup>, Patrik KEMagnusson<sup>42</sup>, David MNathan<sup>104,105</sup>, Gordon H Williams<sup>69,105</sup>, Andrew THattersley<sup>98</sup>, Kaisa Silander<sup>96,111</sup>, Veikko Salomaa<sup>146</sup>, George Davey Smith<sup>38</sup>, Stefan R Bornstein<sup>73</sup>, Peter Schwarz<sup>73</sup>, Joachim Spranger<sup>67,68</sup>, Fredrik Karpe<sup>4,107</sup>, Alan R Shuldiner<sup>45</sup>, Cyrus Cooper<sup>125</sup>, George V Dedoussis<sup>34</sup>, Manuel Serrano-Rios<sup>39</sup>, Andrew DMorris<sup>109</sup>, Lars Lind<sup>132</sup>, Lyle J Palmer<sup>64,66,84</sup>, Frank B Hu<sup>47,148</sup>, Paul WFranks<sup>149</sup>, Shah Ebrahim<sup>150</sup>, Michael Marmot<sup>36</sup>, WH Linda Kao<sup>33,151,152</sup>, James SPankow<sup>153</sup>, Michael J Sampson<sup>154</sup>, Johanna Kuusisto<sup>155</sup>, Markku Laakso<sup>155</sup>, Torben Hansen<sup>31,156</sup>, Oluf Pedersen<sup>31,59,157</sup>, Peter Paul Pramstaller<sup>82,158,159</sup>, H Erich Wichmann<sup>21,160,161</sup>, Thomas Illig<sup>21</sup>, Igor Rudan<sup>24,162,163</sup>, Alan F Wright<sup>25</sup>, Michael Stumvoll<sup>60</sup>, Harry Campbell<sup>24</sup>, James F Wilson<sup>24</sup>, Anders Hamsten on behalf of Procardis Consortium<sup>128</sup>, Richard N Bergman<sup>164</sup>, Thomas A Buchanan<sup>164,165</sup>, Francis SCollins<sup>47</sup>, Karen LMohlke<sup>166</sup>, Jaakko Tuomilehto<sup>94,167</sup>, Timo TValle<sup>167</sup>, David Altshuler<sup>67,104,105</sup>, Jerome I Rotter<sup>62</sup>, David SSiscovick<sup>169</sup>, Brenda WJ H Penninx<sup>140</sup>, Dorret I Boomsma<sup>23</sup>, Panos Deloukas<sup>8</sup>, Timothy DSpector<sup>8,9</sup>, Timothy MFrayling<sup>28</sup>, Luigi Ferrucci<sup>170</sup>, Augustine Kong<sup>19</sup>, Unnur Thorsteinsdottir<sup>19,171</sup>, Kari Stefansson<sup>19,171</sup>, Cornelia Mvan Duijn<sup>22</sup>, Yuri SAulchenko<sup>22</sup>, Antonio Cao<sup>65</sup>, Angelo Scuteri<sup>172,177</sup>, David Schlessinger<sup>47</sup>, Manuela Uda<sup>65</sup>, Aimo Ruokonen<sup>173</sup>, Marjo-Riitta Jarvelin<sup>17,93, 174</sup>, Dawn MWaterworth<sup>26</sup>, Peter Vollenweider<sup>141</sup>, Leena Peltonen<sup>8,48,96,111,112</sup>, Vincent Mooser<sup>26</sup>, Goncalo R Abecasis<sup>10</sup>, Nicholas J Wareham<sup>3</sup>, Robert Sladek<sup>40,41</sup>, Philippe Froguel<sup>13,142</sup>, Richard MWatanabe<sup>164,175</sup>, James B Meigs<sup>35,105</sup>, Leif Groop<sup>102</sup>, Michael Boehnke<sup>10</sup>, Mark I McCarthy<sup>4,5,107</sup>, Jose CFlorez<sup>6,7,104,105</sup> & Inês Barroso<sup>11</sup>.

### MAGIC Investigator Affiliations

<sup>1</sup>Department of Biostatistics, Boston University School of Public Health, Boston, Massachusetts, USA. <sup>2</sup>National Heart, Lung, and Blood Institute's Framingham Heart Study, Framingham, Massachusetts, USA. <sup>3</sup>Medical Research Council (MRC), Epidemiology Unit, Institute of Metabolic Science, Addenbrooke's Hospital, Cambridge, UK. <sup>4</sup>Oxford Centre for Diabetes, Endocrinology and Metabolism, University of Oxford, Oxford, UK. <sup>5</sup>Wellcome Trust Centre for Human Genetics, University of Oxford, Oxford, UK. <sup>6</sup>Program in Medical and Population Genetics, Broad Institute, Cambridge, Massachusetts, USA. <sup>7</sup>Center for Human Genetic Research, Massachusetts General Hospital, Boston, Massachusetts, USA. <sup>8</sup>Wellcome Trust Sanger Institute, Hinxton, Cambridge, UK. <sup>9</sup>Twin Research and Genetic Epidemiology Department, King's College London, St Thomas' Hospital Campus, London, UK. <sup>10</sup>Center for Statistical Genetics, Department of Biostatistics, University of Michigan School of Public Health, Ann Arbor, Michigan, USA. <sup>11</sup>Metabolic Disease Group, Wellcome Trust Sanger Institute, Hinxton, Cambridge, UK. <sup>12</sup>Cardiovascular Health Research Unit and Department of Medicine, University of Washington, Seattle, Washington, USA. <sup>13</sup>Centre National de la Recherche Scientifique–Unité Mixte de Recherche 8090, Pasteur Institute, Lille 2–Droit et Santé University, Lille, France. <sup>14</sup>Department of Medical Genetics, University of Lausanne, Lausanne, Switzerland. <sup>15</sup>University Institute of Social and Preventative Medicine, Centre Hospitalier Universitaire Vaudois (CHUV) and University of Lausanne, Lausanne, Switzerland. <sup>16</sup>Swiss Institute of

## SUPPLEMENTARY DATA

Bioinformatics, Lausanne, Switzerland. <sup>17</sup>Department of Epidemiology and Public Health, Imperial College London, Faculty of Medicine, Norfolk Place, London, UK. <sup>18</sup>Boston University Data Coordinating Center, Boston, Massachusetts, USA. <sup>19</sup>deCODE Genetics, Reykjavik, Iceland. <sup>20</sup>Department of Human Genetics, Leiden University Medical Centre, Leiden, The Netherlands. <sup>21</sup>Institute of Epidemiology, Helmholtz Zentrum Muenchen, German Research Center for Environmental Health, Neuherberg, Germany. <sup>22</sup>Department of Epidemiology, Erasmus Medical College, Rotterdam, The Netherlands. <sup>23</sup>Department of Biological Psychology, VU University Amsterdam, Amsterdam, The Netherlands. <sup>24</sup>Centre for Population Health Sciences, University of Edinburgh, Edinburgh, UK. <sup>25</sup>MRC Human Genetics Unit, Institute of Genetics and Molecular Medicine, Edinburgh, UK. <sup>26</sup>Division of Genetics, Research and Development, GlaxoSmithKline, King of Prussia, Pennsylvania, USA. <sup>27</sup>Department of Cardiovascular Medicine, University of Oxford, Oxford, UK. <sup>28</sup>Genetics of Complex Traits, Institute of Biomedical and Clinical Sciences, Peninsula College of Medicine and Dentistry, University of Exeter, Exeter, UK. <sup>29</sup>National Institute of Aging, Baltimore, Maryland, USA. <sup>30</sup>Unit for Child and Adolescent Health and Welfare, National Institute for Health and Welfare, Biocenter Oulu, University of Oulu, Oulu, Finland. <sup>31</sup>Hagedorn Research Institute, Gentofte, Denmark. <sup>32</sup>Department of Medicine and Therapeutics, Level 7, Ninewells Hospital and Medical School, Dundee, UK. <sup>33</sup>Department of Epidemiology, Bloomberg School of Public Health, Johns Hopkins University, Baltimore, Maryland, USA. <sup>34</sup>Department of Nutrition–Dietetics, Harokopio University, Athens, Greece. <sup>35</sup>General Medicine Division, Massachusetts General Hospital, Boston, Massachusetts, USA. <sup>36</sup>Department of Epidemiology and Public Health, University College London, London, UK. <sup>37</sup>Departments of Nutrition and Epidemiology, Harvard School of Public Health, Boston, Massachusetts, USA. <sup>38</sup>MRC Centre for Causal Analyses in Translational Epidemiology, University of Bristol, Bristol, UK. <sup>39</sup>Fundación para la Investigación Biomédica del Hospital Clínico San Carlos, Madrid, Spain. <sup>40</sup>Departments of Medicine and Human Genetics, McGill University, Montreal, Canada. <sup>41</sup>Genome Quebec Innovation Centre, Montreal, Canada. <sup>42</sup>Department of Medical Epidemiology and Biostatistics, Karolinska Institutet, Stockholm, Sweden. <sup>43</sup>Department of Public Health and Caring Sciences, Uppsala University, Uppsala, Sweden. <sup>44</sup>Division of Statistical Genomics, Department of Genetics, Washington University School of Medicine, St. Louis, Missouri, USA. <sup>45</sup>Division of Endocrinology, Diabetes and Nutrition, University of Maryland School of Medicine, Baltimore, Maryland, USA. <sup>46</sup>INSERM U859, Université de Lille-Nord de France, Lille, France. <sup>47</sup>Genome Technology Branch, National Human Genome Research Institute, Bethesda, Maryland, USA. <sup>48</sup>The Broad Institute, Cambridge, Massachusetts, USA. <sup>49</sup>Leiden Genome Technology Center, Leiden University Medical Center, Leiden, The Netherlands. <sup>50</sup>INSERM U780, Paris Sud University, Villejuif, France. <sup>51</sup>The Heart Research Institute, Sydney, New South Wales, Australia. <sup>52</sup>PathWest Laboratory of Western Australia, Department of Molecular Genetics, J Block, QEII Medical Centre, Nedlands West Australia, Australia. <sup>53</sup>School of Surgery and Pathology, University of Western Australia, Nedlands West Australia, Australia. <sup>54</sup>Department of Social Medicine, University of Bristol, Bristol, UK. <sup>55</sup>Landsþítali University Hospital, Reykjavik, Iceland. <sup>56</sup>Icelandic Heart Association, Kopavogur, Iceland. <sup>57</sup>The Human Genetics Center and Institute of Molecular Medicine, University of Texas Health Science Center, Houston, Texas, USA. <sup>58</sup>Steno Diabetes Center, Gentofte, Denmark. <sup>59</sup>Faculty of Health Science, University of Aarhus, Aarhus, Denmark. <sup>60</sup>Department of Medicine, University of Leipzig, Leipzig, Germany. <sup>61</sup>Endocrinology–Diabetology Unit, Corbeil-Essonnes Hospital, Essonnes, France. <sup>62</sup>Medical Genetics Institute, Cedars-Sinai Medical Center, Los Angeles, California, USA. <sup>63</sup>Clinical Trial Service Unit and Epidemiological Studies Unit, University of Oxford, Oxford, UK. <sup>64</sup>Centre for Genetic Epidemiology and Biostatistics, University of Western Australia, Perth, Australia. <sup>65</sup>Istituto di Neurogenetica e Neurofarmacologia (INN), Consiglio Nazionale delle Ricerche, c/o Cittadella Universitaria di Monserrato, Monserrato, Cagliari, Italy. <sup>66</sup>Western Australian Sleep Disorders Research Institute, Queen Elizabeth Medical Centre II, Perth, Australia. <sup>67</sup>Department of Endocrinology, Diabetes and Nutrition, Charite-Universitaetsmedizin Berlin, Berlin, Germany. <sup>68</sup>Department of Clinical Nutrition, German Institute of Human Nutrition Potsdam-Rehbruecke, Nuthetal, Germany. <sup>69</sup>Division of Endocrinology, Diabetes, and Hypertension, Brigham and Women's Hospital, Harvard Medical School, Boston, Massachusetts, USA. <sup>70</sup>Department of Human Genetics, Leiden University Medical Center, Leiden, The Netherlands. <sup>71</sup>Department of Cardiovascular Research, Istituto di Ricerche Farmacologiche 'Mario Negri', Milan, Italy. <sup>72</sup>Institut National de la Santé et de la Recherche Médicale, Institut National de la Recherche Agronomique, Université Paris 13, Bobigny Cedex, France. <sup>73</sup>Department of Medicine III, Division Prevention and Care of Diabetes, University of Dresden, Dresden, Germany. <sup>74</sup>Center for Human Nutrition, University of Texas Southwestern Medical Center, Dallas, Texas, USA. <sup>75</sup>Department of Genetics and Pathology, Rudbeck Laboratory, Uppsala University, Uppsala, Sweden. <sup>76</sup>Centre Hospitalier Universitaire, de Poitiers, Endocrinologie Diabetologie, CIC INSERM 0802, INSERM U927, Université de Poitiers, Unité de Formation et de Recherche, Médecine Pharmacie, Poitiers, France. <sup>77</sup>Department of Public Health and Clinical Medicine, Section for Nutritional Research, Umeå University, Umeå, Sweden. <sup>78</sup>Department of Clinical Sciences, Obstetrics and Gynecology, University of Oulu, University of Oulu, Finland. <sup>79</sup>Centre Nationale de Génotypage/Institut de génomique/Commissariat à l'énergie atomique, Evry Cedex, France. <sup>80</sup>INSERM U872, Faculté de Médecine Paris Descartes, Paris Cedex, France. <sup>81</sup>Institute for Clinical Diabetology, German Diabetes Center, Leibniz Center for Diabetes Research at Heinrich Heine University Düsseldorf, Düsseldorf, Germany. <sup>82</sup>Institute of Genetic Medicine, European Academy Bozen/Bolzano (EURAC), Viale Druso, Bolzano, Italy, Affiliated Institute of the University Lübeck, Lübeck, Germany. <sup>83</sup>Department of Pulmonary Physiology, Sir Charles Gairdner Hospital, Perth, Australia. <sup>84</sup>Busselton Population Medical Research Foundation, Sir Charles Gairdner Hospital, Perth, Australia. <sup>85</sup>Heart Institute of Western Australia, Sir Charles Gairdner Hospital, Nedlands West Australia, Australia. <sup>86</sup>School of Medicine and Pharmacology, University of Western Australia, Nedlands West Australia, Australia. <sup>87</sup>Folkhalsan Research Centre, Helsinki, Finland. <sup>88</sup>Malmiska Municipal Health Care Center and Hospital, Jakobstad, Finland. <sup>89</sup>Nuffield Department of Surgery, University of Oxford, Oxford, UK. <sup>90</sup>Research Centre for Prevention and Health, Glostrup University Hospital, Glostrup, Denmark. <sup>91</sup>Faculty of Health Science, University of Copenhagen, Copenhagen, Denmark. <sup>92</sup>National Institute for Health and Welfare, Unit of Population Studies, Turku, Finland. <sup>93</sup>Institute of Health Sciences and Biocenter Oulu, University of Oulu, Oulu, Finland. <sup>94</sup>Department of Public Health, Faculty of Medicine, University of Helsinki, Helsinki, Finland. <sup>95</sup>National Institute for Health and Welfare, Unit for Child and Adolescent Mental Health, Helsinki, Finland. <sup>96</sup>Institute for Molecular Medicine Finland (FIMM), University of Helsinki, Helsinki, Finland. <sup>97</sup>Department of Internal Medicine and Biocenter Oulu, Oulu, Finland. <sup>98</sup>Diabetes Genetics, Institute of Biomedical and Clinical Science, Peninsula College of Medicine and Dentistry, University of Exeter, Exeter, UK. <sup>99</sup>National Institute for Health and Welfare, Unit of Living Conditions, Health and Wellbeing, Helsinki, Finland. <sup>100</sup>Interdisciplinary Centre for Clinical Research, University of Leipzig, Leipzig, Germany. <sup>101</sup>The Danish Twin Registry, Epidemiology, Institute of Public Health, University of Southern Denmark, Odense, Denmark. <sup>102</sup>Department of Clinical Sciences, Diabetes and Endocrinology, Lund University, University Hospital Malmö, Malmö, Sweden. <sup>103</sup>Gladstone Institute of Cardiovascular Disease, University of California, San Francisco, California, USA. <sup>104</sup>Diabetes Research Center, Diabetes Unit, Massachusetts General Hospital, Boston, Massachusetts, USA. <sup>105</sup>Department of Medicine, Harvard Medical School, Boston, Massachusetts, USA. <sup>106</sup>Division of Cardiology, University of Ottawa Heart Institute, Ottawa, Ontario, Canada. <sup>107</sup>Oxford National Institute for Health Research, Biomedical Research Centre, Churchill Hospital, Oxford, UK. <sup>108</sup>Department of Clinical Genetics, Erasmus Medical College, Rotterdam, The Netherlands. <sup>109</sup>Biomedical Research Institute, University of Dundee, Ninewells Hospital and Medical School, Dundee, UK. <sup>110</sup>Department of Geriatric Medicine and Metabolic Disease, Second University of Naples, Naples, Italy. <sup>111</sup>National Institute for Health and Welfare, Unit of Public Health Genomics, Helsinki, Finland. <sup>112</sup>Department of Medical Genetics, University of Helsinki, Helsinki, Finland. <sup>113</sup>Department of Medical Statistics, Epidemiology and Medical Informatics, Andrija Stampar School of Public Health, Medical School, University of Zagreb, Rockefellerova, Zagreb, Croatia. <sup>114</sup>Department of Clinical Genetics, VU University and Medical Center, Amsterdam, The Netherlands. <sup>115</sup>Department of Obstetrics and Gynaecology, Oulu University Hospital, Oulu, Finland. <sup>116</sup>Departments of Medicine, Epidemiology and Health Services, University of Washington, Seattle, Washington, USA. <sup>117</sup>Group Health Research Institute, Group Health Cooperative, Seattle, Washington, USA. <sup>118</sup>Institute of Biometrics and Epidemiology, German Diabetes Centre, Leibniz Centre at Heinrich Heine University Düsseldorf, Düsseldorf, Germany. <sup>119</sup>Department of Biostatistics, University of Washington, Seattle, Washington, USA. <sup>120</sup>Department of Internal Medicine, Erasmus Medical College, Rotterdam, The Netherlands. <sup>121</sup>Department of Metabolic Diseases, Heinrich Heine University Düsseldorf, Düsseldorf, Germany. <sup>122</sup>Department of Public Health and Clinical Medicine, Section for Family Medicine, Umeå University, Umeå, Sweden. <sup>123</sup>School of Public Health, Department of General Practice, University of Aarhus, Aarhus, Denmark. <sup>124</sup>Department of Public Health and Primary Care, Strangeways Research Laboratory, University of Cambridge, Cambridge, UK. <sup>125</sup>MRC Epidemiology Resource Centre, University of Southampton, Southampton General Hospital,

## SUPPLEMENTARY DATA

Southampton, UK. <sup>126</sup>Department of Epidemiology, University of Texas, M.D. Anderson Cancer Center, Houston, Texas, USA. <sup>127</sup>Leibniz-Institut für Arterioskleroseforschung an der Universität Münster, Münster, Germany. <sup>128</sup>Atherosclerosis Research Unit, Department of Medicine, Karolinska Institutet, Stockholm, Sweden. <sup>129</sup>Laboratory of Neurogenetics, National Institute on Aging, Bethesda, Maryland, USA. <sup>130</sup>Department of Epidemiology, University of Washington, Seattle, Washington, USA. <sup>131</sup>Seattle Epidemiologic Research and Information Center, Department of Veterans Affairs Office of Research and Development, Seattle, Washington, USA. <sup>132</sup>Department of Medical Sciences, Uppsala University, Uppsala, Sweden. <sup>133</sup>Medstar Research Institute, Baltimore, Maryland, USA. <sup>134</sup>Clinical Research Branch, National Institute on Aging, Baltimore, Maryland, USA. <sup>135</sup>Institut interrégional pour la santé (IRSA), La Riche, France. <sup>136</sup>Coordination Centre for Clinical Trials, University of Leipzig, Leipzig, Germany. <sup>137</sup>Department of Medicine, Helsinki University Hospital, University of Helsinki, Helsinki, Finland. <sup>138</sup>Department of Internal Medicine, Leiden University Medical Centre, Leiden, The Netherlands. <sup>139</sup>Research Unit, Cardiovascular Genetics, Nancy University Henri Poincaré, Nancy, France. <sup>140</sup>EMGO Institute for Health and Care Research, Department of Psychiatry, VU University Medical Center, Amsterdam, The Netherlands. <sup>141</sup>Department of Internal Medicine, Centre Hospitalier Universitaire Vaudois, Lausanne, Switzerland. <sup>142</sup>Genomic Medicine, Imperial College London, Hammersmith Hospital, London, UK. <sup>143</sup>Epidemiology and Public Health, Queen's University Belfast, Belfast, UK. <sup>144</sup>Medical Products Agency, Uppsala, Sweden. <sup>145</sup>See Supplementary Note for a full list of authors. <sup>146</sup>National Institute for Health and Welfare, Unit of Chronic Disease Epidemiology and Prevention, Helsinki, Finland. <sup>147</sup>Departments of Nutrition and Epidemiology, Harvard School of Public Health, Boston, Massachusetts, USA. <sup>148</sup>Channing Laboratory, Brigham and Women's Hospital and Harvard Medical School, Boston, Massachusetts, USA. <sup>149</sup>Genetic Epidemiology and Clinical Research Group, Department of Public Health and Clinical Medicine, Section for Medicine, Umeå University Hospital, Umeå, Sweden. <sup>150</sup>London School of Hygiene and Tropical Medicine, London, UK. <sup>151</sup>Department of Medicine, School of Medicine, Johns Hopkins University, Baltimore, Maryland, USA. <sup>152</sup>The Welch Center for Prevention, Epidemiology, and Clinical Research, School of Medicine and Bloomberg School of Public Health, Johns Hopkins University, Baltimore, Maryland, USA. <sup>153</sup>Division of Epidemiology and Community Health, School of Public Health, University of Minnesota, Minneapolis, Minnesota, USA. <sup>154</sup>Department of Endocrinology and Diabetes, Norfolk and Norwich University Hospital National Health Service Trust, Norwich, UK. <sup>155</sup>Department of Medicine, University of Kuopio and Kuopio University Hospital, Kuopio, Finland. <sup>156</sup>Faculty of Health Science, University of Southern Denmark, Odense, Denmark. <sup>157</sup>Institute of Biomedical Science, Faculty of Health Science, University of Copenhagen, Copenhagen, Denmark. <sup>158</sup>Department of Neurology, General Central Hospital, Bolzano, Italy. <sup>159</sup>Department of Neurology, University of Lübeck, Lübeck, Germany. <sup>160</sup>Institute of Medical Informatics, Biometry and Epidemiology, Ludwig-Maximilians-Universität, Munich, Germany. <sup>161</sup>Klinikum Grosshadern, Munich, Germany. <sup>162</sup>School of Medicine, University of Split, Split, Croatia. <sup>163</sup>Gen-Info Ltd., Zagreb, Croatia. <sup>164</sup>Department of Physiology and Biophysics, Keck School of Medicine, University of Southern California, Los Angeles, California, USA. <sup>165</sup>Department of Medicine, Division of Endocrinology, Keck School of Medicine, University of Southern California, Los Angeles, California, USA. <sup>166</sup>Department of Genetics, University of North Carolina, Chapel Hill, North Carolina, USA. <sup>167</sup>National Institute for Health and Welfare, Unit of Diabetes Prevention, Helsinki, Finland. <sup>168</sup>South Ostrobothnia Central Hospital, Seinäjoki, Finland. <sup>169</sup>Departments of Medicine and Epidemiology, University of Washington, Seattle, Washington, USA. <sup>170</sup>Longitudinal Studies Section, Clinical Research Branch, National Institute on Aging, NIH, Baltimore, Maryland, USA. <sup>171</sup>Faculty of Medicine, University of Iceland, Reykjavík, Iceland. <sup>172</sup>Lab of Cardiovascular Sciences, National Institute on Aging, National Institutes of Health, Baltimore, Maryland, USA. <sup>173</sup>Department of Clinical Sciences/Clinical Chemistry, University of Oulu, University of Oulu, Oulu, Finland. <sup>174</sup>National Institute of Health and Welfare, Oulu, Finland. <sup>175</sup>Department of Preventive Medicine, Keck School of Medicine, University of Southern California, Los Angeles, California, USA. <sup>176</sup>MRC–Health Protection Agency Centre for Environment and Health, Imperial College London, London, UK. <sup>177</sup>UOC Geriatria, Istituto Nazionale Ricovero e cura per Anziani (INRCA) IRCCS, Rome, Italy. Correspondence should be addressed to M.B. (boehnke@umich.edu), M.I.M. (mark.mccarthy@dr1.ox.ac.uk), J.C.F. (jcflorez@partners.org) or I.B. (ib1@sanger.ac.uk).
